# Supplementary material for: The germ cell-specific RNA binding protein RBM46 is essential for spermatogonial differentiation in mice
Source: PLoS Genet. 2022 Sep 21;18(9):e1010416. doi: 10.1371/journal.pgen.1010416 (PMC9529142; doi:10.1371/journal.pgen.1010416)
Supplement: S2 Table — (XLS) [file pgen.1010416.s010.xls]

## Sheet: Table S2
Module ID	Gene ID	Gene Name	Chr	Strand	LSV ID(s)	Event ID	Complex	Collapsed Event Name	De Novo	Junction Name	Junction Coordinate	rbm46_wt_E(PSI)	rbm46_ko_E(PSI)	rbm46_wt-rbm46_ko_E(dPSI)	rbm46_wt-rbm46_ko_P(|dPSI|>=0.15)	rbm46_wt-rbm46_ko_P(|dPSI|<=0.05)
ENSMUSG00000028089.5_1	ENSMUSG00000028089.5	Chd1l	3	-	ENSMUSG00000028089.5:s:97580979-97581177	ENSMUSG00000028089.5_1_A5_1	FALSE	Alt 5x1	FALSE	E1_E2_Proximal	97572709-97580979	0.781	0.001	-0.781	1	0
ENSMUSG00000050064.14_1	ENSMUSG00000050064.14	Zfp697	3	+	ENSMUSG00000050064.14:s:98382461-98382578	ENSMUSG00000050064.14_1_ALE_1	TRUE	Alt 3x1_ALEx1	FALSE	C_A_Proximal	98382578-98410491	0.717	0.018	-0.709	1	0
ENSMUSG00000041536.13_1	ENSMUSG00000041536.13	Serpina3a	12	+	ENSMUSG00000041536.13:t:104118421-104118694	ENSMUSG00000041536.13_1_CE_1	TRUE	Cassettex1_ALEx1_Multi Exon Spanningx1	FALSE	C2_A	104116612-104118421	0.834	0.285	-0.564	1	0
ENSMUSG00000021466.12_1	ENSMUSG00000021466.12	Ptch1	13	-	ENSMUSG00000021466.12:s:63563029-na	ENSMUSG00000021466.12_1_OR_1	TRUE	P_AFEx1_Orphan Junctionx1	TRUE	Orphan	63560917-63563029	0.456	0.031	-0.42	0.998	0
ENSMUSG00000035125.10_1	ENSMUSG00000035125.10	Gcfc2	6	+	ENSMUSG00000035125.10:t:81935906-81936021	ENSMUSG00000035125.10_1_pAFE_1	TRUE	ALEx1_P_AFEx1	TRUE	C_A_Proximal	81935762-81935906	0.571	0.168	-0.404	1	0
ENSMUSG00000056260.15_1	ENSMUSG00000056260.15	Lrif1	3	+	ENSMUSG00000056260.15:s:106732914-106733142	ENSMUSG00000056260.15_1_CE_1	FALSE	Cassettex1	FALSE	C1_A	106733142-106733337	0.702	0.32	-0.372	0.995	0
ENSMUSG00000030020.13_1	ENSMUSG00000030020.13	Prickle2	6	-	ENSMUSG00000030020.13:t:92705346-92705431	ENSMUSG00000030020.13_1_pAFE_1	FALSE	P_AFEx1	TRUE	C_A_Proximal	92705431-92705996	0.552	0.169	-0.366	0.97	0
ENSMUSG00000036598.4_1	ENSMUSG00000036598.4	Ccdc113	8	+	ENSMUSG00000036598.4:s:95538092-95538418	ENSMUSG00000036598.4_1_A5_1	FALSE	Alt 5x1	TRUE	E1_E2_Proximal	95538418-95540799	0.693	0.334	-0.35	0.986	0
ENSMUSG00000037270.18_1	ENSMUSG00000037270.18	4932438A13Rik	3	+	ENSMUSG00000037270.18:s:36863104-36863348	ENSMUSG00000037270.18_1_A5_1	FALSE	Alt 5x1	FALSE	E1_E2_Proximal	36863348-36864387	0.529	0.2	-0.341	1	0
ENSMUSG00000078994.9_1	ENSMUSG00000078994.9	Zfp429	13	-	ENSMUSG00000078994.9:t:67396630-67396756	ENSMUSG00000078994.9_1_AFE_1	FALSE	AFEx1	TRUE	C_A_Proximal	67396756-67397263	0.467	0.124	-0.334	0.99	0
ENSMUSG00000047146.17_1	ENSMUSG00000047146.17	Tet1	10	-	ENSMUSG00000047146.17:t:62819473-62819623	ENSMUSG00000047146.17_1_pAFE_1	FALSE	P_AFEx1	TRUE	C_A_Proximal	62819623-62819760	0.34	0.017	-0.316	1	0
ENSMUSG00000032329.4_1	ENSMUSG00000032329.4	Hmg20a	9	+	ENSMUSG00000032329.4:s:56489822-56490325	ENSMUSG00000032329.4_1_A3_1	FALSE	Alt 3x1	TRUE	E1_E2_Proximal	56489964-56494526	0.617	0.326	-0.291	0.997	0
ENSMUSG00000114923.1_1	ENSMUSG00000114923.1	Gm49345	13	-	ENSMUSG00000114923.1:s:67637647-67637769	ENSMUSG00000114923.1_1_pALE_1	TRUE	P_ALEx1_Orphan Junctionx2	TRUE	C_A_Proximal	67627381-67637647	0.325	0.041	-0.279	0.983	0
ENSMUSG00000028820.13_1	ENSMUSG00000028820.13	Sfpq	4	+	ENSMUSG00000028820.13:t:127035808-127035854	ENSMUSG00000028820.13_1_pAFE_1	FALSE	P_AFEx1	TRUE	C_A_Proximal	127032805-127035808	0.659	0.389	-0.269	0.991	0
ENSMUSG00000005699.16_1	ENSMUSG00000005699.16	Pard6a	8	+	ENSMUSG00000005699.16:t:105702174-105702396	ENSMUSG00000005699.16_1_AFE_1	FALSE	AFEx1	FALSE	C_A_Proximal	105701803-105702174	0.548	0.27	-0.263	0.961	0
ENSMUSG00000037211.12_1	ENSMUSG00000037211.12	Spry1	3	+	ENSMUSG00000037211.12:t:37640520-37640808	ENSMUSG00000037211.12_1_AFE_1	FALSE	AFEx1	FALSE	C_A_Proximal	37640105-37640520	0.744	0.496	-0.248	0.983	0
ENSMUSG00000015839.6_1	ENSMUSG00000015839.6	Nfe2l2	2	-	ENSMUSG00000015839.6:s:75704364-75704641	ENSMUSG00000015839.6_1_ALE_1	FALSE	ALEx1	FALSE	C_A_Proximal	75692372-75704364	0.31	0.071	-0.241	1	0
ENSMUSG00000029190.19_1	ENSMUSG00000029190.19	D5Ertd579e	5	-	ENSMUSG00000029190.19:s:36613246-36613730	ENSMUSG00000029190.19_1_CE_1	FALSE	Cassettex1	TRUE	C1_A	36611946-36613246	0.359	0.125	-0.228	0.953	0
ENSMUSG00000106797.1_1	ENSMUSG00000106797.1	Gm42936	5	-	ENSMUSG00000106797.1:s:36613246-36613739	ENSMUSG00000106797.1_1_CE_1	FALSE	Cassettex1	TRUE	C1_A	36611946-36613246	0.359	0.125	-0.228	0.953	0
ENSMUSG00000044350.14_1	ENSMUSG00000044350.14	Lacc1	14	-	ENSMUSG00000044350.14:t:77034793-77035405	ENSMUSG00000044350.14_1_CE_1	FALSE	Cassettex1	FALSE	C2_A	77035405-77035812	0.74	0.994	0.233	0.993	0
ENSMUSG00000037017.15_1	ENSMUSG00000037017.15	Zscan21	5	+	ENSMUSG00000037017.15:t:138126454-138126646	ENSMUSG00000037017.15_1_CE_1	FALSE	Cassettex1	FALSE	C2_A	138125690-138126454	0.634	0.872	0.235	0.973	0
ENSMUSG00000073643.11_1	ENSMUSG00000073643.11	Wdfy1	1	-	ENSMUSG00000073643.11:s:79724645-79724757	ENSMUSG00000073643.11_1_ALE_1	FALSE	ALEx1	TRUE	C_A_Proximal	79722268-79724645	0.593	0.863	0.254	0.953	0
ENSMUSG00000048772.15_1	ENSMUSG00000048772.15	Tmem53	4	+	ENSMUSG00000048772.15:t:117267890-117268582	ENSMUSG00000048772.15_1_CE_1	FALSE	Cassettex1	FALSE	C2_A	117265975-117267890	0.54	0.806	0.256	0.978	0
ENSMUSG00000040877.16_1	ENSMUSG00000040877.16	Wdr25	12	+	ENSMUSG00000040877.16:t:108897909-108898725	ENSMUSG00000040877.16_1_AFE_1	FALSE	AFEx1	FALSE	C_A_Proximal	108897059-108897909	0.077	0.354	0.261	0.953	0
ENSMUSG00000026976.15_1	ENSMUSG00000026976.15	Pax8	2	-	ENSMUSG00000026976.15:s:24436448-24436568	ENSMUSG00000026976.15_1_ALE_1	FALSE	ALEx1	FALSE	C_A_Proximal	24435969-24436448	0.584	0.898	0.297	0.957	0
ENSMUSG00000052214.9_1	ENSMUSG00000052214.9	Opa3	7	+	ENSMUSG00000052214.9:s:19228334-19229112	ENSMUSG00000052214.9_1_ALE_1	FALSE	ALEx1	FALSE	C_A_Proximal	19228584-19244754	0.563	0.862	0.302	1	0
ENSMUSG00000073007.10_1	ENSMUSG00000073007.10	Tent5d	X	+	ENSMUSG00000073007.10:t:107862957-107863020	ENSMUSG00000073007.10_1_pAFE_1	FALSE	P_AFEx1	TRUE	C_A_Proximal	107826945-107862957	0.325	0.646	0.303	0.973	0
ENSMUSG00000022973.18_1	ENSMUSG00000022973.18	Synj1	16	-	ENSMUSG00000022973.18:s:90976599-90976751	ENSMUSG00000022973.18_1_A3_1	FALSE	Alt 3x1	FALSE	E1_E2_Proximal	90974075-90976599	0.657	0.965	0.304	0.996	0
ENSMUSG00000009585.18_1	ENSMUSG00000009585.18	Apobec3	15	+	ENSMUSG00000009585.18:s:79898111-79898225	ENSMUSG00000009585.18_1_CE_1	FALSE	Cassettex1	FALSE	C1_A	79898225-79899020	0.313	0.634	0.317	0.997	0
ENSMUSG00000031594.9_1	ENSMUSG00000031594.9	Fgl1	8	-	ENSMUSG00000031594.9:t:41200445-41200604	ENSMUSG00000031594.9_1_pAFE_1	FALSE	P_AFEx1	TRUE	C_A_Proximal	41200604-41209186	0.335	0.675	0.321	0.968	0
ENSMUSG00000032425.15_1	ENSMUSG00000032425.15	Zfp949	9	+	ENSMUSG00000032425.15:t:88554376-88554544	ENSMUSG00000032425.15_1_CE_1	FALSE	Cassettex1	FALSE	C2_A	88552861-88554376	0.287	0.622	0.337	1	0
ENSMUSG00000022362.13_1	ENSMUSG00000022362.13	Gm29394	15	-	ENSMUSG00000022362.13:t:58048547-58048785	ENSMUSG00000022362.13_1_pAFE_1	FALSE	P_AFEx1	FALSE	C_A_Distal	58048785-58069319	0.368	0.732	0.348	0.973	0
ENSMUSG00000028558.14_1	ENSMUSG00000028558.14	Calr4	4	+	ENSMUSG00000028558.14:t:109235632-109235875	ENSMUSG00000028558.14_1_A5_1	FALSE	Alt 5x1	FALSE	E2_E1_Proximal	109235632-109235774	0.384	0.755	0.354	0.973	0
ENSMUSG00000025968.16_1	ENSMUSG00000025968.16	Ndufs1	1	-	ENSMUSG00000025968.16:s:63175637-63175688	ENSMUSG00000025968.16_1_ALE_1	FALSE	ALEx1	TRUE	C_A_Proximal	63172257-63175637	0.501	0.892	0.389	0.995	0
ENSMUSG00000028898.15_1	ENSMUSG00000028898.15	Trnau1ap	4	-	ENSMUSG00000028898.15:t:132325352-132325489	ENSMUSG00000028898.15_1_AFE_1	FALSE	AFEx1	FALSE	C_A_Proximal	132325489-132325946	0.404	0.797	0.394	0.998	0
ENSMUSG00000068877.12_1	ENSMUSG00000068877.12	Selenbp2	3	+	ENSMUSG00000068877.12:t:94696992-94697104	ENSMUSG00000068877.12_1_AFE_1	FALSE	AFEx1	FALSE	C_A_Proximal	94696850-94696992	0.177	0.612	0.445	1	0
